# Supplementary material for: The Identification of Novel Diagnostic Marker Genes for the Detection of Beer Spoiling Pediococcus damnosus Strains Using the BlAst Diagnostic Gene findEr
Source: PLoS One. 2016 Mar 30;11(3):e0152747. doi: 10.1371/journal.pone.0152747 (PMC4814128; doi:10.1371/journal.pone.0152747)
Supplement: S8 Table — Description of all files produced by BADGE in verbose (clean_up = false) mode (group A genomes/ORFs were named A1 and A2, group B genomes/ORFs were named B1, B2 and B3). In case of using PROTEIN-LEVEL BADGE additional, analog designations are created with amino acid sequences. If the filters of Step 4 and / or 5 are disabled, the corresponding files are not produced. The term “blast hit” within the descriptions refers to a blast hit based on the chosen settings for a particular blast. The files which allow the user to easily follow the DMG finding process are printed bold (note: open files with file name extension:.distribution,.frequency and.tsv with spreadsheet application; open files with file name extension:.alignment with web browser; all other files can be opened with any text editor). Box highlights files directly suited for follow-up applications, e.g. DMG selection, consensus sequence creation and primer design. (XLSX) [file pone.0152747.s008.xlsx]

## Sheet: Sheet1
S8 Table. Description of all files produced by BADGE in verbose (clean_up=false) mode (group A genomes/ORFs were named A1 and A2, group B genomes/ORFs were named B1, B2 and B3). In case of using PROTEIN-LEVEL BADGE additional, analog designations are created with amino acid sequences. If the filters of Step 4 and / or 5 are disabled, the corresponding files are not produced. The term “blast hit” …
	file names	description
Preparations: create / modify necessary fasta files and databases	A1_db.log	BLAST database files for ORFs of genome A1
	A1.nhr
	A1.nin
	A1.nog
	A1.nsd
	A1.nsi
	A1.nsq
	A2.nhr	BLAST database files for ORFs of genome A2
	A2.nin
	A2.nog
	A2.nsd
	A2.nsi
	A2.nsq
	A2_db.log
	A1_genome_db.log	BLAST database files for genome (contigs) of genome A1
	A1_genome.nhr
	A1_genome.nin
	A1_genome.nog
	A1_genome.nsd
	A1_genome.nsi
	A1_genome.nsq
	A2_genome_db.log	BLAST database files for genome (contigs) of genome A2
	A2_genome.nhr
	A2_genome.nin
	A2_genome.nog
	A2_genome.nsd
	A2_genome.nsi
	A2_genome.nsq
	A_orfs.fasta	Fasta file containing all ORFs of group A genomes & BLAST database files for ORFs of all group A genomes
	A_orfs_db.log
	A_orfs.nhr
	A_orfs.nin
	A_orfs.nog
	A_orfs.nsd
	A_orfs.nsi
	A_orfs.nsq
	A_genomes.fasta	Fasta file containing all genomes (contigs) of group A genomes & BLAST database files for genomes (contigs) of all group A genomes
	A_genomes_db.log
	A_genomes.nhr
	A_genomes.nin
	A_genomes.nog
	A_genomes.nsd
	A_genomes.nsi
	A_genomes.nsq
	A_orfs.identifier	Identifier of all group A ORFs
	A_A1_orfs.identifier	Identifier of ORFs of genome A1
	A_A2_orfs.identifier	Identifier of ORFs of genome A2
	B1_db.log	same files as for group A (see above)
	...
	B_B3_orfs.identifier
	error.log	Error log of makeblastdb command
Step1: Get potential A-DMGs	Step1_1_B_vs_A_orfs.blast	Megablast output – all group B-ORFs (query) vs all group A-ORFs (db)
	Step1_2_B_vs_A_orfs_blast.identifier	Identifier of group A ORFs to be discarded – blast hit in group B ORFs
	Step1_3_A_DMGs.identifier	Identifier of group A ORFs to be kept – no blast hit in group B ORFs – A-DMGs
	Step1_4_A_DMGs.fasta	Fasta file containing all group A-DMGs remaining after Step1
Step2: Genome filter potential A-DMGs	Step2_1_A_DMGs_vs_B_genomes.blast	Megablast output – all group A-DMGs (query) vs all group B-genomes (db)
	Step2_2_A_DMGs_vs_B_genomes_blast.identifier	Identifier of group A-DMGs to be discarded – blast hit in group B genomes
	Step2_3_A_DMGs.identifier	Identifier of group A-DMGs to be kept – no blast hit in group B genomes
	Step2_4_A_DMGs.fasta	Fasta file containing all group A-DMGs remaining after the Step2
Step3: Occurrence filter potential A-DMGs	Step3_1_A_DMGs_vs_A1.blast	Megablast output – all group A-DMGs (query) vs A1-ORFs (db)
	Step3_1_A_DMGs_vs_A2.blast	Megablast output – all group A-DMGs (query) vs A2-ORFs (db)
	Step3_2_A_DMGs_vs_A1_blast.identifier	Identifier of group A-DMGs found in A1-ORFs
	Step3_2_A_DMGs_vs_A2_blast.identifier	Identifier of group A-DMGs found in A2-ORFs
	Step3_3_A_DMGs.distribution	Distribution of A-DMGs in group A genomes
	Step3_4_A_DMGs.identifier	Identifier of group A-DMGs filtered according to minimum DMG occurrence
	Step3_5_A_DMGs.fasta	Fasta file containing all group A-DMGs filtered according to minimum DMG occurrence
	Step3_6_A_DMGs_vs_A_orfs.blast	Megablast output – of all remaining A-DMGs (query) vs all group A-ORFs (db)
	Step3_7_A_DMGs_vs_A_orfs.identifier	Identifier of group A-DMGs found in all group A-ORFs
	Step3_8_A_DMGs_vs_A_orfs_sort.identifier	Sorted identifier of group A-DMGs found in all group A-ORFs
	Step3_9_A_DMGs_vs_A1.blast	Megablast output – all group A-DMGs (query) vs A1-ORFs (db)
	Step3_9_A_DMGs_vs_A2.blast	Megablast output – all group A-DMGs (query) vs A2-ORFs (db)
	Step3_10_A_DMGs_vs_A1_blast.identifier	Identifier of group A-DMGs found in A1-ORFs
	Step3_10_A_DMGs_vs_A2_blast.identifier	Identifier of group A-DMGs found in A2-ORFs
	Step3_11_A_DMGs.distribution	Distribution of A-DMGs in group A genomes (AFTER minimum DMG occurrence filter)
	Step3_11_A_DMGs.frequency	Frequency (muliplie copies) of A-DMGs in group A genomes
	Step3_12_A_DMGs_sort.distribution	Sorted distribution of A-DMGs in group A genomes
	Step3_13_A_DMGs_sort.identifier	Sorted identifier of group A-DMGs found in all group A-ORFs
	Step3_14_A_DMGs_final.fasta	Fasta file containing all group A-DMGs remaining after the Step3
Step4: Optional – DC-Megablast filter A-DMGs	Step4_1_A_DMGs.fasta	Fasta file containing all group A-DMGs remaining after the Step3
	Step4_2_A_DMGs_vs_B_genomes_dc.blast	DC-Megablast output – all group A-DMGs (query) vs all group B-genomes (db)
	Step4_3_A_DMGs_vs_B_genomes_dc.identifier	Identifier of group A-DMGs to be discarded – DC blast hit in group B genomes
	Step4_4_A_DMGs.identifier	Identifier of group A-DMGs to be kept – no DC blast hit in group B genomes
	Step4_5_A_DMGs.fasta	Fasta file containing all group A-DMGs remaining after DC-Megablast filter
	Step4_6_A_DMGs_vs_A_orfs.blast	Megablast output – of all remaining A-DMGs (query) vs all group A-ORFs (db)
	Step4_7_A_DMGs_A1.identifier	Identifier of group A-DMGs which are represented by an A1 identifier
	Step4_7_A_DMGs_A2.identifier	Identifier of group A-DMGs which are represented by an A2 identifier
	Step4_8_A_DMGs_A1.fasta	Fasta file containing all group A-DMGs originating from an A1 representative
	Step4_9_A_DMGs_vs_A_orfs.blast	Megablast output – sorted Step4_6_A_DMGs_vs_A_orfs.blast
	Step4_10_A_DMGs_vs_A_orfs.identifier	Identifier of group A-DMGs found in all group A-ORFs
	Step4_11_A_DMGs_vs_A_orfs_sort.identifier	Sorted identifier of group A-DMGs found in all group A-ORFs
	Step4_12_A_DMGs_1_genomes_filtered_dc_megablast_vs_A1.blast	Megablast output – all group A-DMGs (query) vs A1-ORFs (db)
	Step4_12_A_DMGs_1_genomes_filtered_dc_megablast_vs_A2.blast	Megablast output – all group A-DMGs (query) vs A2-ORFs (db)
	Step4_12_A_DMGs_vs_A1_blast.identifier	Identifier of group A-DMGs found in A1-ORFs
	Step4_12_A_DMGs_vs_A2_blast.identifier	Identifier of group A-DMGs found in A2-ORFs
	Step4_13_A_DMGs.frequency	Frequency (muliplie copies) of A-DMGs in group A genomes
	Step4_14_A_DMGs.distribution	Distribution of A-DMGs in group A genomes (AFTER DC-Megablst filter)
	Step4_15_A_DMGs_sort.distribution	Sorted distribution of A-DMGs in group A genomes
	Step4_16_A_DMGs_sort.identifier	Sorted identifier of group A-DMGs found in all group A-ORFs
	Step4_17_A_DMGs_final.fasta	Fasta file containing all group A-DMGs remaining after the Step4
Step5: Optional – Blastn filter A-DMGs	Step5_1_A_DMGs.fasta	Fasta file containing all group A-DMGs remaining after the Step4 (just a copy of preceding file)
	Step5_1_A_DMGs.identifier	Identifier of A-DMGs remaining after Step4
	Step5_2_A_DMGs_vs_B_genomes_blastn.blast	Blastn output – all group A-DMGs (query) vs all group B-genomes (db)
	Step5_3_A_DMGs_vs_B_genomes_blastn.identifier	Identifier of group A-DMGs to be discarded – Blastn hit in group B genomes
	Step5_4_A_DMGs.identifier	Identifier of group A-DMGs to be kept – no Blastn hit in group B genomes
	Step5_5_A_DMGs.fasta	Fasta file containing all group A-DMGs remaining after Blastn filter
	Step5_6_A_DMGs_vs_A_orfs.blast	Megablast output – of all remaining A-DMGs (query) vs all group A-ORFs (db)
	Step5_7_A_DMGs_A1.identifier	Identifier of group A-DMGs which are represented by an A1 identifier
	Step5_7_A_DMGs_A2.identifier	Identifier of group A-DMGs which are represented by an A2 identifier
	Step5_8_A_DMGs_A1.fasta	Fasta file containing all group A-DMGs originating from an A1 representative
	Step5_9_A_DMGs_vs_A_orfs.blast	Megablast output – sorted Step5_6_A_DMGs_vs_A_orfs.blast
	Step5_10_A_DMGs_vs_A_orfs.identifier	Identifier of group A-DMGs found in all group A-ORFs
	Step5_11_A_DMGs_vs_A_orfs_sort.identifier	Sorted identifier of group A-DMGs found in all group A-ORFs
	Step5_12_A_DMGs_vs_A1.blast	Megablast output – all group A-DMGs (query) vs A1-ORFs (db)
	Step5_12_A_DMGs_vs_A2.blast	Megablast output – all group A-DMGs (query) vs A2-ORFs (db)
	Step5_12_A_DMGs_vs_A1_blast.identifier	Identifier of group A-DMGs found in A1-ORFs
	Step5_12_A_DMGs_vs_A2_blast.identifier	Identifier of group A-DMGs found in A2-ORFs
	Step5_13_A_DMGs.frequency	Frequency (muliplie copies) of A-DMGs in group A genomes
	Step5_14_A_DMGs.distribution	Distribution of A-DMGs in group A genomes (AFTER DC-Megablst filter)
	Step5_15_A_DMGs_sort.distribution	Sorted distribution of A-DMGs in group A genomes
	Step5_16_A_DMGs_sort.identifier	Sorted identifier of group A-DMGs found in all group A-ORFs
	Step5_17_A_DMGs_final.fasta	Fasta file containing all group A-DMGs remaining after the Step5
Step6: Create final output	Step6_1_A_DMGs.fasta	Fasta file containing all group A-DMGs remaining after the Step5 (just a copy of preceding file)
	Step6_1_A_DMGs.distribution	Distribution of A-DMGs in group A genomes (AFTER all filter are applied)
	Step6_1_A_DMGs_vs_A_orfs_sort.identifier	Sorted identifier of group A-DMGs found in all group A-ORFs
	Step6_2_A_DMGs_dc.blast	DC-Megablast output – all group A-DMGs (query) vs all group B-genomes (db)
	Step6_2_A_DMGs_blastn.blast	Blastn output – all group A-DMGs (query) vs all group B-genomes (db)
	Step6_3_A_DMGs.fasta	Fasta file containing all group A-DMGs and each ORF of the DMGs (each copy found in all genomes)
	Step6_4_A_DMGs_genome.blast	Megablast output – all group A-DMGs with every ORF of the DMGs vs all group A genomes
	Step6_4_DMG_1_ID_pos.identifier	Identifier, contig and position of all ORFs of the DMG 1
	BADGE_DMGs_fasta_for_alignments/Step6_4_DMG_X_seq_align.fasta	Sequences of all ORFs of the DMG X (could be used for alignment and consensus creation, primer design)
Final output files	BADGE_A_vs_B_blastn.alignment	Blastn output – all group A-DMGs (query) vs all group B-genomes (db) – Control alignment (html)
	BADGE_A_vs_B_dc_megablast.alignment	DC-Megablast output – all group A-DMGs (query) vs all group B-genomes (db) – Control alignment (html)
	BADGE_A_vs_B_DMGs.fasta	Fasta file containing all group A-DMGs identified by BADGE
	BADGE_A_vs_B_DMGs.frequency	Frequency (multiple copies) of all group A-DMGs in group A genomes identified by BADGE
	BADGE_A_vs_B_DMGs.distribution	Distribution of A-DMGs in group A genomes identified by BADGE
	BADGE_A_vs_B_final_out.tsv	Tabular final output file – contains information about quality, quantity and location of all A-DMGs identified by BADGE
	BADGE.settings	Settings file – contains the setting of the BADGE run
